# Supplementary material
Source: PubMed Central journal article supplement (PMC4289122)

**Table E1. Differentially expressed genes between cultured primary nasal epithelial cells and NE**

| <b>Chromosome</b> | <b>Gene.Name</b> | <b>Gene.ID</b>  | <b>Sum.of.Exon.Length.of.Gene</b> |
|-------------------|------------------|-----------------|-----------------------------------|
| chr12             | KRT6A            | ENSG00000205420 | 2489                              |
| chr17             | KRT17            | ENSG00000128422 | 2460                              |
| chr12             | KRT6C            | ENSG00000170465 | 2813                              |
| chr1              | S100A2           | ENSG00000196754 | 1567                              |
| chr1              | S100A9           | ENSG00000163220 | 577                               |
| chr17             | KRT14            | ENSG00000186847 | 2251                              |
| chr1              | LAMB3            | ENSG00000196878 | 4628                              |
| chr1              | SFN              | ENSG00000175793 | 1315                              |
| chr17             | KRT16            | ENSG00000186832 | 2475                              |
| chr1              | S100A14          | ENSG00000189334 | 1277                              |
| chr1              | LAMC2            | ENSG00000058085 | 6406                              |
| chr1              | SPRR1B           | ENSG00000169469 | 620                               |
| chr4              | AREG             | ENSG00000109321 | 1648                              |
| chr4              | AREGB            | ENSG00000205595 | 1647                              |
| chr1              | S100A6           | ENSG00000197956 | 774                               |
| chr16             | MT2A             | ENSG00000125148 | 903                               |
| chr19             | LGALS7B          | ENSG00000178934 | 644                               |
| chr9              | ANXA2P2          | ENSG00000231991 | 1310                              |
| chr19             | LGALS7           | ENSG00000205076 | 795                               |
| chr17             | ITGB4            | ENSG00000132470 | 6629                              |
| chr20             | SLPI             | ENSG00000124107 | 596                               |
| chr1              | G0S2             | ENSG00000123689 | 866                               |
| chr1              | F3               | ENSG00000117525 | 2875                              |
| chr13             | GJB2             | ENSG00000165474 | 2425                              |
| chr1              | S100A8           | ENSG00000143546 | 889                               |
| chr1              | TACSTD2          | ENSG00000184292 | 2068                              |
| chr17             | KRT19            | ENSG00000171345 | 1891                              |
| chr1              | S100A16          | ENSG00000188643 | 1675                              |
| chr10             | COL17A1          | ENSG00000065618 | 6426                              |
| chr1              | SPRR1A           | ENSG00000169474 | 647                               |
| chr22             | LGALS1           | ENSG00000100097 | 969                               |
| chr9              | ANXA1            | ENSG00000135046 | 4561                              |
| chr15             | ANXA2            | ENSG00000182718 | 8268                              |
| chr12             | KRT7             | ENSG00000135480 | 3884                              |
| chr12             | KRT75            | ENSG00000170454 | 2324                              |
| chr2              | IL1A             | ENSG00000115008 | 2124                              |
| chr1              | S100A11          | ENSG00000163191 | 680                               |
| chr10             | ANXA8L1          | ENSG00000150165 | 2127                              |
| chr12             | RP11-1020M18.10  | ENSG00000257500 | 629                               |
| chr10             | ANXA8L2          | ENSG00000186807 | 2128                              |
| chrX              | SAT1             | ENSG00000130066 | 2075                              |
| chr6              | CDKN1A           | ENSG00000124762 | 2933                              |
| chr12             | RP11-386G11.10   | ENSG00000258017 | 1388                              |

**Table E2. Functional anno**

**A. cNE> NEC-iPSC**

Annotation Cluster 1

Category

GOTERM\_BP\_FAT

GOTERM\_BP\_FAT

GOTERM\_BP\_FAT

GOTERM\_BP\_FAT

Annotation Cluster 2

Category

GOTERM\_BP\_FAT

GOTERM\_BP\_FAT

GOTERM\_BP\_FAT

GOTERM\_BP\_FAT

GOTERM\_BP\_FAT

GOTERM\_BP\_FAT

Annotation Cluster 3

Category

GOTERM\_BP\_FAT

GOTERM\_BP\_FAT

GOTERM\_BP\_FAT

GOTERM\_BP\_FAT

GOTERM\_BP\_FAT

GOTERM\_CC\_FAT

GOTERM\_BP\_FAT

GOTERM\_BP\_FAT

GOTERM\_BP\_FAT

Annotation Cluster 4

Category

GOTERM\_BP\_FAT

Annotation Cluster 5

**Table E3. Differentially methylated CpG sites between cultured primary nasal epithelial cells and**

| <b>TargetID</b> | <b>cNE_1</b> | <b>cNE_2</b> | <b>cNE_3</b> | <b>NEC_iPSC_1</b> | <b>NEC_iPSC_2</b> | <b>NEC_iPSC_3</b> | <b>meancNE</b> |
|-----------------|--------------|--------------|--------------|-------------------|-------------------|-------------------|----------------|
| cg15835664      | 0.0500       | 0.0531       | 0.0508       | 0.8622            | 0.8634            | 0.8654            | 0.0513         |
| cg07543967      | 0.0238       | 0.0189       | 0.0230       | 0.9342            | 0.9340            | 0.9304            | 0.0219         |
| cg08199953      | 0.9207       | 0.9187       | 0.9213       | 0.0469            | 0.0458            | 0.0452            | 0.9202         |
| cg09556700      | 0.0420       | 0.0457       | 0.0425       | 0.8997            | 0.9041            | 0.9017            | 0.0434         |
| cg03370077      | 0.0672       | 0.0714       | 0.0690       | 0.8768            | 0.8797            | 0.8796            | 0.0692         |
| cg06799735      | 0.0642       | 0.0664       | 0.0631       | 0.7385            | 0.7368            | 0.7406            | 0.0646         |
| cg18598117      | 0.0093       | 0.0132       | 0.0075       | 0.9846            | 0.9786            | 0.9844            | 0.0100         |
| cg10622644      | 0.0315       | 0.0359       | 0.0316       | 0.9048            | 0.9042            | 0.9097            | 0.0330         |
| cg24697184      | 0.0583       | 0.0588       | 0.0594       | 0.3166            | 0.3154            | 0.3168            | 0.0588         |
| cg05050042      | 0.9755       | 0.9790       | 0.9817       | 0.0232            | 0.0204            | 0.0183            | 0.9787         |
| cg02604225      | 0.0469       | 0.0451       | 0.0509       | 0.8981            | 0.9009            | 0.9047            | 0.0476         |
| cg24647820      | 0.0371       | 0.0410       | 0.0398       | 0.8426            | 0.8374            | 0.8413            | 0.0393         |
| cg16072777      | 0.0273       | 0.0325       | 0.0283       | 0.8215            | 0.8270            | 0.8273            | 0.0294         |
| cg13580834      | 0.0394       | 0.0383       | 0.0438       | 0.7936            | 0.7903            | 0.7949            | 0.0405         |
| cg00944666      | 0.0910       | 0.0903       | 0.0960       | 0.8382            | 0.8437            | 0.8391            | 0.0924         |
| cg18354462      | 0.0945       | 0.0927       | 0.0976       | 0.7723            | 0.7737            | 0.7775            | 0.0949         |
| cg20850016      | 0.0292       | 0.0339       | 0.0312       | 0.6654            | 0.6680            | 0.6689            | 0.0314         |
| cg22215508      | 0.0279       | 0.0268       | 0.0323       | 0.7916            | 0.7955            | 0.7956            | 0.0290         |
| cg18708412      | 0.2119       | 0.2108       | 0.2158       | 0.7883            | 0.7925            | 0.7926            | 0.2129         |
| cg23622047      | 0.0405       | 0.0344       | 0.0395       | 0.8824            | 0.8795            | 0.8870            | 0.0382         |
| cg01697719      | 0.8381       | 0.8396       | 0.8450       | 0.0147            | 0.0204            | 0.0131            | 0.8409         |
| cg05991442      | 0.0237       | 0.0155       | 0.0154       | 0.9794            | 0.9857            | 0.9794            | 0.0182         |
| cg02357751      | 0.9775       | 0.9771       | 0.9864       | 0.0182            | 0.0255            | 0.0297            | 0.9803         |
| cg12601118      | 0.0162       | 0.0239       | 0.0200       | 0.9727            | 0.9667            | 0.9760            | 0.0200         |
| cg11452329      | 0.0219       | 0.0254       | 0.0319       | 0.9638            | 0.9558            | 0.9559            | 0.0264         |
| cg09550697      | 0.0593       | 0.0628       | 0.0520       | 0.9706            | 0.9812            | 0.9770            | 0.0580         |
| cg14428166      | 0.0371       | 0.0433       | 0.0336       | 0.9337            | 0.9314            | 0.9408            | 0.0380         |
| cg10030684      | 0.0264       | 0.0314       | 0.0338       | 0.8710            | 0.8753            | 0.8802            | 0.0305         |
| cg09445935      | 0.8925       | 0.8955       | 0.8932       | 0.0516            | 0.0469            | 0.0484            | 0.8938         |
| cg20477160      | 0.0552       | 0.0478       | 0.0482       | 0.8985            | 0.8920            | 0.8949            | 0.0504         |
| cg09803262      | 0.8920       | 0.8840       | 0.8875       | 0.0479            | 0.0488            | 0.0408            | 0.8878         |
| cg07060794      | 0.0672       | 0.0729       | 0.0662       | 0.9089            | 0.9086            | 0.9134            | 0.0688         |
| cg02579959      | 0.0734       | 0.0696       | 0.0765       | 0.8862            | 0.8845            | 0.8926            | 0.0731         |
| cg01515444      | 0.0691       | 0.0614       | 0.0672       | 0.8772            | 0.8685            | 0.8752            | 0.0659         |
| cg16754788      | 0.0892       | 0.0975       | 0.0970       | 0.8885            | 0.8962            | 0.8947            | 0.0945         |
| cg08576476      | 0.0278       | 0.0354       | 0.0325       | 0.8272            | 0.8283            | 0.8351            | 0.0319         |
| cg06481431      | 0.0372       | 0.0441       | 0.0444       | 0.8354            | 0.8322            | 0.8390            | 0.0419         |
| cg21970789      | 0.8612       | 0.8562       | 0.8639       | 0.0704            | 0.0698            | 0.0632            | 0.8605         |
| cg24686551      | 0.0399       | 0.0345       | 0.0414       | 0.8245            | 0.8193            | 0.8244            | 0.0386         |
| cg18251389      | 0.0285       | 0.0233       | 0.0191       | 0.7779            | 0.7809            | 0.7869            | 0.0236         |
| cg22540040      | 0.0814       | 0.0730       | 0.0774       | 0.8246            | 0.8331            | 0.8283            | 0.0773         |
| cg12018581      | 0.0419       | 0.0404       | 0.0363       | 0.7756            | 0.7830            | 0.7782            | 0.0395         |
| cg01899130      | 0.0503       | 0.0496       | 0.0526       | 0.7883            | 0.7890            | 0.7925            | 0.0508         |

**Table E4. Functional clust**

Annotation Cluster 1

Category

GOTERM\_BP\_FAT  
GOTERM\_BP\_FAT

Annotation Cluster 2

Category

GOTERM\_BP\_FAT  
GOTERM\_MF\_FAT  
GOTERM\_BP\_FAT  
GOTERM\_BP\_FAT

Annotation Cluster 3

Category

GOTERM\_BP\_FAT  
GOTERM\_BP\_FAT  
GOTERM\_BP\_FAT

Annotation Cluster 4

Category

GOTERM\_CC\_FAT  
GOTERM\_CC\_FAT  
GOTERM\_CC\_FAT

**Table E5. Differentially methylated CpG sites between NEC-iPSCs and ESCs.****A. All 1731 CpG sites**

| <b>TargetID</b> | <b>meanESC</b> | <b>meanIPSC</b> | <b>meancNE</b> | <b>absd_ESCvsIPSC</b> | <b>BHp_ESCvsIPSC</b> |
|-----------------|----------------|-----------------|----------------|-----------------------|----------------------|
| cg03699469      | 0.4937         | 0.0335          | 0.0346         | 0.4601                | 0.0017               |
| cg21823080      | 0.7828         | 0.0354          | 0.3187         | 0.7474                | 0.0074               |
| cg12080079      | 0.1769         | 0.6571          | 0.5791         | 0.4802                | 0.0074               |
| rs3936238       | 0.9539         | 0.0256          | 0.0284         | 0.9284                | 0.0074               |
| cg18375421      | 0.8798         | 0.1318          | 0.1575         | 0.7481                | 0.0077               |
| cg23476401      | 0.8713         | 0.4024          | 0.6323         | 0.4690                | 0.0077               |
| cg13424673      | 0.8318         | 0.0447          | 0.0468         | 0.7871                | 0.0084               |
| cg14670974      | 0.9731         | 0.0036          | 0.0086         | 0.9695                | 0.0084               |
| cg01847719      | 0.9625         | 0.0270          | 0.0200         | 0.9355                | 0.0084               |
| cg13423383      | 0.9135         | 0.0595          | 0.2962         | 0.8539                | 0.0084               |
| cg00963169      | 0.5798         | 0.0198          | 0.0241         | 0.5600                | 0.0084               |
| cg02623400      | 0.5101         | 0.0318          | 0.0467         | 0.4783                | 0.0084               |
| cg08519216      | 0.6086         | 0.0223          | 0.0122         | 0.5863                | 0.0084               |
| cg22962698      | 0.5023         | 0.0155          | 0.0124         | 0.4868                | 0.0084               |
| cg03091331      | 0.6812         | 0.1130          | 0.1455         | 0.5682                | 0.0084               |
| cg14189141      | 0.9534         | 0.0162          | 0.0228         | 0.9372                | 0.0084               |
| rs1416770       | 0.9611         | 0.0306          | 0.0293         | 0.9306                | 0.0084               |
| rs5987737       | 0.9515         | 0.0206          | 0.9546         | 0.9310                | 0.0084               |
| cg14369648      | 0.9623         | 0.0237          | 0.0217         | 0.9385                | 0.0087               |
| cg07883457      | 0.4447         | 0.0129          | 0.1870         | 0.4318                | 0.0087               |
| cg05331731      | 0.3675         | 0.2089          | 0.5649         | 0.1585                | 0.0089               |
| cg13300273      | 0.9810         | 0.0776          | 0.0370         | 0.9033                | 0.0089               |
| cg24434800      | 0.4744         | 0.0447          | 0.0971         | 0.4297                | 0.0089               |
| cg02469838      | 0.5169         | 0.6616          | 0.4611         | 0.1447                | 0.0089               |
| cg05759718      | 0.9569         | 0.0166          | 0.0166         | 0.9402                | 0.0091               |
| cg13678973      | 0.6333         | 0.0242          | 0.0342         | 0.6091                | 0.0091               |
| cg05463257      | 0.6902         | 0.5394          | 0.6924         | 0.1507                | 0.0091               |
| cg17641252      | 0.8114         | 0.1479          | 0.0320         | 0.6635                | 0.0091               |
| cg00968488      | 0.0582         | 0.5868          | 0.0864         | 0.5286                | 0.0091               |
| cg06817264      | 0.8437         | 0.4174          | 0.0677         | 0.4263                | 0.0094               |
| cg16908938      | 0.0479         | 0.8851          | 0.1807         | 0.8372                | 0.0107               |
| cg02086866      | 0.4205         | 0.5306          | 0.4441         | 0.1101                | 0.0107               |
| cg13647892      | 0.0704         | 0.8761          | 0.7055         | 0.8057                | 0.0108               |
| cg14615336      | 0.7911         | 0.0466          | 0.0511         | 0.7445                | 0.0122               |
| cg19961545      | 0.6519         | 0.0371          | 0.0378         | 0.6149                | 0.0122               |
| cg00397324      | 0.6653         | 0.0111          | 0.0053         | 0.6542                | 0.0122               |
| cg11748936      | 0.4867         | 0.0544          | 0.0544         | 0.4323                | 0.0122               |
| cg18490616      | 0.4884         | 0.0449          | 0.0641         | 0.4435                | 0.0122               |
| cg18588323      | 0.3816         | 0.2632          | 0.0721         | 0.1184                | 0.0122               |
| cg03217897      | 0.8427         | 0.0507          | 0.0532         | 0.7920                | 0.0122               |
| cg13138089      | 0.7029         | 0.0245          | 0.0279         | 0.6784                | 0.0122               |
| cg19300401      | 0.0384         | 0.9101          | 0.7996         | 0.8717                | 0.0122               |
| cg04039414      | 0.4947         | 0.0235          | 0.0177         | 0.4712                | 0.0129               |

**Table E6. Functional anr  
A.CpG sites with potenti**

Annotation Cluster 1

Category

GOTERM\_MF\_FAT

GOTERM\_MF\_FAT

GOTERM\_MF\_FAT

GOTERM\_MF\_FAT

GOTERM\_MF\_FAT

Annotation Cluster 2

Category

SMART

SMART

GOTERM\_MF\_FAT

GOTERM\_MF\_FAT

GOTERM\_BP\_FAT

GOTERM\_BP\_FAT

GOTERM\_BP\_FAT

GOTERM\_BP\_FAT

GOTERM\_MF\_FAT

GOTERM\_MF\_FAT

Annotation Cluster 3

Category

GOTERM\_CC\_FAT

GOTERM\_CC\_FAT

GOTERM\_CC\_FAT

GOTERM\_CC\_FAT

Annotation Cluster 4

Category

GOTERM\_BP\_FAT

GOTERM\_BP\_FAT

GOTERM\_BP\_FAT

GOTERM\_CC\_FAT

GOTERM\_BP\_FAT

GOTERM\_BP\_FAT

GOTERM\_BP\_FAT

GOTERM\_BP\_FAT

Annotation Cluster 5

Category

GOTERM\_BP\_FAT

GOTERM\_BP\_FAT

GOTERM\_BP\_FAT

Annotation Cluster 6

Category

GOTERM\_BP\_FAT

**Table E7. Primers for qPCR.**

| Primer    | Sequence                      |
|-----------|-------------------------------|
| NANOG_F   | 5'-AAAGAATCTTCACCTATGCC-3'    |
| NANOG_R   | 5'- GAAGGAAGAGGAGAGACAGT-3'   |
| NANOG_F_2 | 5'- CTAAGAGGTGGCAGAAAAACA-3'  |
| NANOG_R_2 | 5'- CTGGTGGTAGGAAGAGTAAAGG-3' |
| MEOX1_F   | 5'- AGGAGAGTTCAGACAACCAG-3'   |
| MEOX1_R   | 5'- CGAGTCAGGTAGTTATGATGG-3'  |
| FOXF1_F   | 5'- GCCTCTTATATCAAGCAGCA-3'   |
| FOXF1_R   | 5'- CAAACTCCTTTCGGTCACAC-3'   |
| ALB_F     | 5'- GAAGACTATCTATCCGTGGT-3'   |
| ALB_R     | 5' TCAGCATTAAACTCTTTGGG-3'    |
| FABP1_F   | 5'-TTCTCCGGCAAGTACCAACT-3'    |
| FABP1_R   | 5'- CACCCCCTTGATATCCTTCC-3'   |
| SOX1_F    | 5'- CAAGTTGCTAACCGATGTGA-3'   |
| SOX1_R    | 5'- GGAAACCTAAGGCTGCTGA-3'    |
| TH_F      | 5'- GAAATTGAGAAGCTGTCCAC-3'   |
| TH_R      | 5'- CTCTCAGACACGAAGTAGAC-3'   |
| CK19_F    | 5'-GGTCAGTGTGGAGGTGGATT-3'    |
| CK19_R    | 5'-TCAGTAACCTCGGACCTGCT-3'    |
| CTSF_F    | 5'-CCTGTTGAATGAGGATCCCC-3'    |
| CTSF_R    | 5'-GCTCGCACCATGTTATTGAC-3'    |
| KRT5_F    | 5'-GCTGAGAATGAGTTTGTGATGC-3'  |
| KRT5_R    | 5'-GCTCCGCATCAAAGAACATC-3'    |
| SPRR2A_F  | 5'-ACCCCTGGTACCTGAGC-3'       |
| SPRR2A_R  | 5'-TGCTGTTGATAAGACATCCTGC-3'  |
| GAPDH_F   | 5'- AAGGTGAAGGTCGGAGTCAA-3'   |
| GAPDH_R   | 5'- AATGAAGGGGTCATTGATGG-3'   |

**Table E8. Primers for bisulfite pyrosequencing and the CpG sites interrogated.**

| IllunimalID      | GeneID                      | Primer           | Sequence (5'->3')               | Chr |
|------------------|-----------------------------|------------------|---------------------------------|-----|
| Not Available    | OCT4                        | F                | AAGTTTATATAGATAGGAGATGGGTATA    | 6   |
|                  |                             | R                | AAACTCCCCTTCAAATCTATTTTT        |     |
|                  |                             | NF               | GGGGAAAAGTTTTAAAAGATTTA         |     |
|                  |                             | NIP <sup>a</sup> | ATTCTATTTACAAAAAATAACCAA        |     |
|                  |                             | S1               | TTTGTAATGAGAAGTTTTATTTAAG       |     |
| Not Available    | NANOG                       | S2               | GATAAATATTATTTTTATAGATAG        |     |
|                  |                             | F                | GGTTGGTTTTAAATTTTTGATTTTAG      | 12  |
|                  |                             | R                | ACCAATCTCACCAAACCATTATAA        |     |
|                  |                             | NF               | TTAATTTATTGGGATTATAGGGGTG       |     |
|                  |                             | NIP <sup>a</sup> | AACAACAAAACCTAAAAACAAACC        |     |
| S1               | TTAATTTATTGGGATTATAGGGGTG   |                  |                                 |     |
| cg01847719       | CAT                         | S2               | GAATTATTTTTGATTTAAAAGTTG        |     |
|                  |                             | F                | GGTTTGAAGGATGTTGATAAT           | 11  |
|                  |                             | R                | ACTCCTTCCAATACTACATCTAATC       |     |
|                  |                             | NF               | TATTGGGTTTTTAATTTTGGTTTGT       |     |
|                  |                             | NIP <sup>a</sup> | ACTCCTTCCAATACTACATCTAATC       |     |
| S                | GAGGTTTTTGTAGTGTTTTGTATAG   |                  |                                 |     |
| cg05765254       | RPTN                        | F                | TGTGTTTAGGATTTTATAAGGGAATTATAA  | 1   |
|                  |                             | R                | ATTCTTTACTTTCTTCTCTACCCACCTA    |     |
|                  |                             | NF               | TGAATTTTAGGGATAGGATATGTTAAGT    |     |
|                  |                             | NIP <sup>a</sup> | TCCTTTCAAAAACAACATAAAACTC       |     |
|                  |                             | S                | TGTGGAGTTTTTATGGTTGGGTTTG       |     |
| cg04993112       | SPRR2A                      | F                | GTAATTTGTTAATGTGTTAGGAGGA       | 1   |
|                  |                             | R                | AAAATCTAAAATTTTATAAAAAAAA       |     |
|                  |                             | NF               | AAGGGGAGATTTAATAAAGGTTTGA       |     |
|                  |                             | NIP <sup>a</sup> | AACAAAATCATCAAATAACACAATAC      |     |
|                  |                             | S                | ATTTATTTTTGAGTTTGTAGGTATTG      |     |
| cg00368577       | KRT5                        | F                | GGGGATTTTATGTAATTTTTTAAAAA      | 12  |
|                  |                             | R                | TTCCATTACCTTAACCCTAAAAAAA       |     |
|                  |                             | NF               | AAATTTTGAGATTTATGGGTTATAG       |     |
|                  |                             | NIP <sup>a</sup> | CTAATAAAATTA AAAACTCCTACAAATATA |     |
|                  |                             | S1               | AAATTTTGAGATTTATGGGTTATAG       |     |
| cg11752250       | ARG2                        | S2               | GTTTTATTTTATTAGGGAAGAAATGAG     |     |
|                  |                             | F                | TTGTTTTTAAAATAGTTTGTATATATTGT   | 14  |
|                  |                             | R                | ATCTCCTCCAAAAAAAACCTAAAACC      |     |
|                  |                             | NF               | TTTTTTAAAAGAATTATTTTATATTGAAGA  |     |
|                  |                             | NIP <sup>a</sup> | AATCTCTTAAAACAAAACCTACAAAC      |     |
| cg16643473       | ANO3                        | S1               | TTTTTTAAAAGAATTATTTTATATTGAAGA  |     |
|                  |                             | S2               | TGGAGATATTTTGTAGTTTATTG         |     |
|                  |                             | F                | GGTTGTATTTTGTGTTGTGAATAGAG      | 11  |
|                  |                             | R                | CAACACATATCAAAAATTCCTACTA       |     |
|                  |                             | NF               | AATTTTTAGTTTTTATAGGTTGAT        |     |
| NIP <sup>a</sup> | ACCAAATAACTTTACCAAATCTTTATC |                  |                                 |     |
| S                | AATTTTTAGTTTTTATAGGTTGAT    |                  |                                 |     |

<sup>a</sup>5' biotinylated; <sup>b</sup>Chromosomal coordinates are based on the UCSC Genome Browser Human February 20



A.

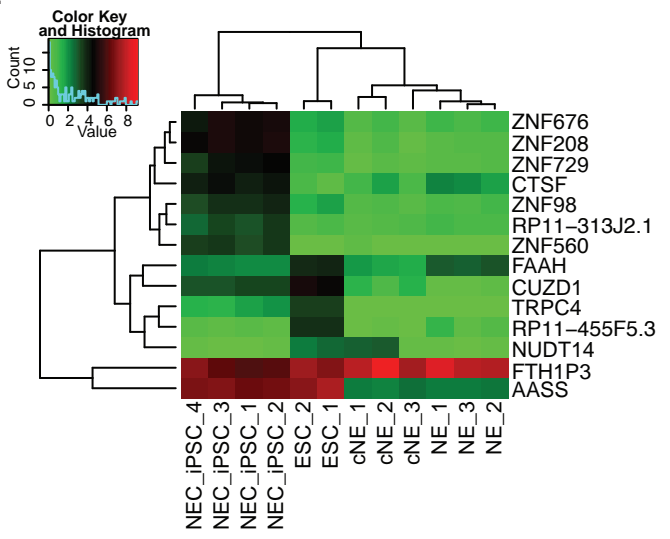

B.

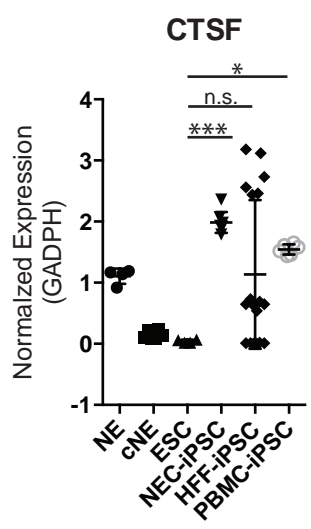

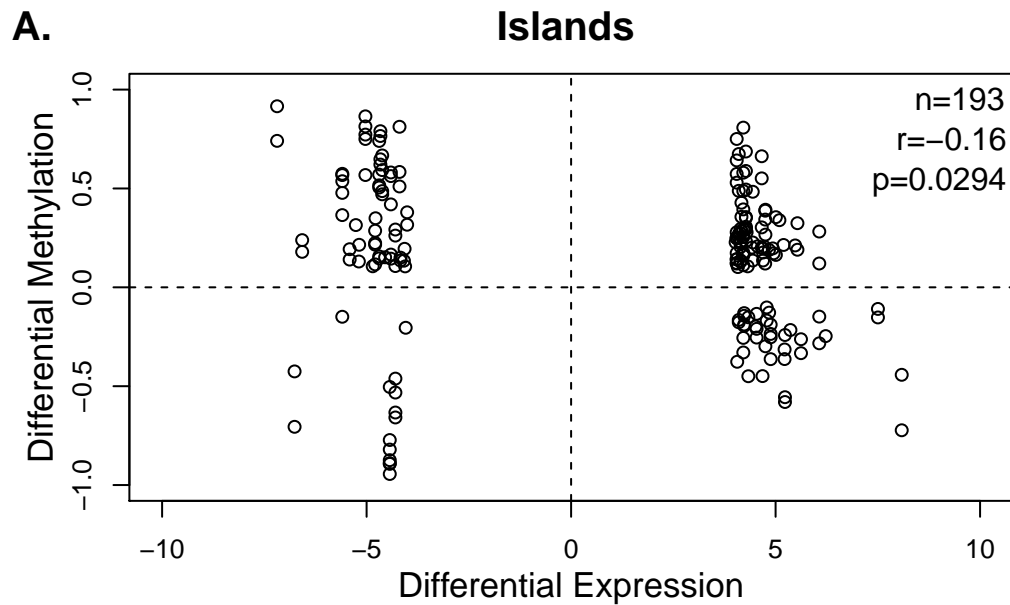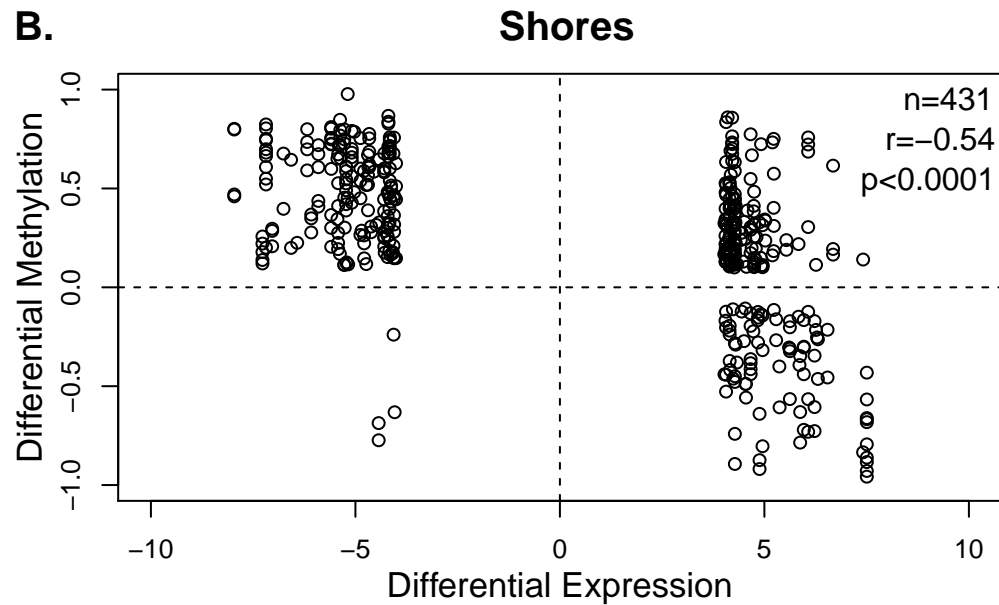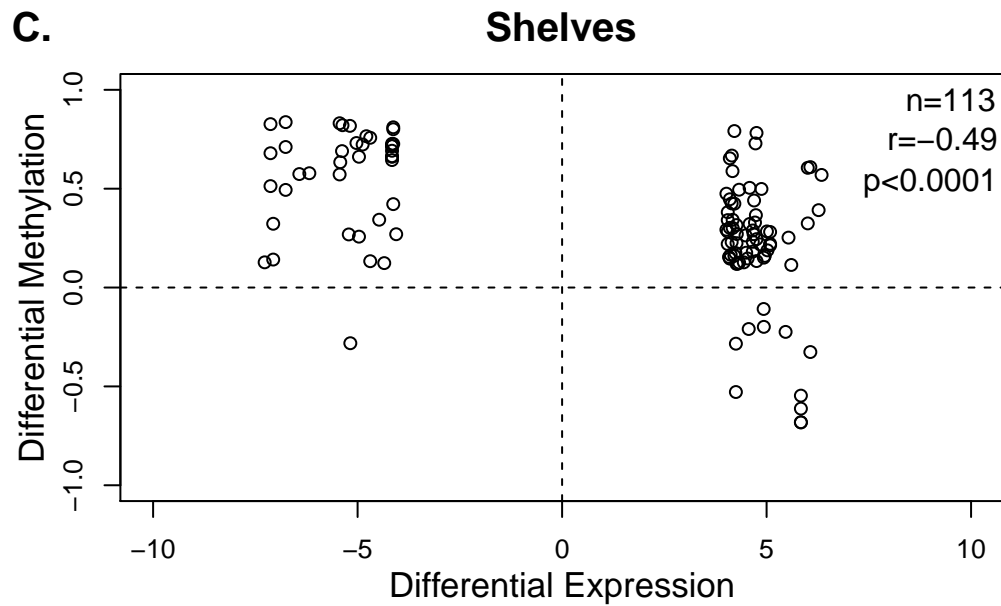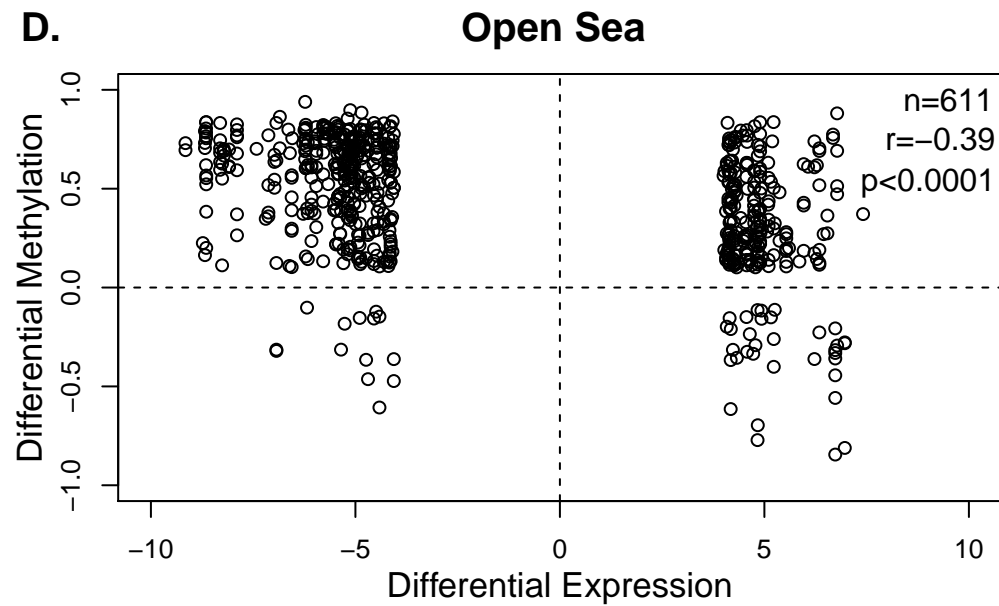

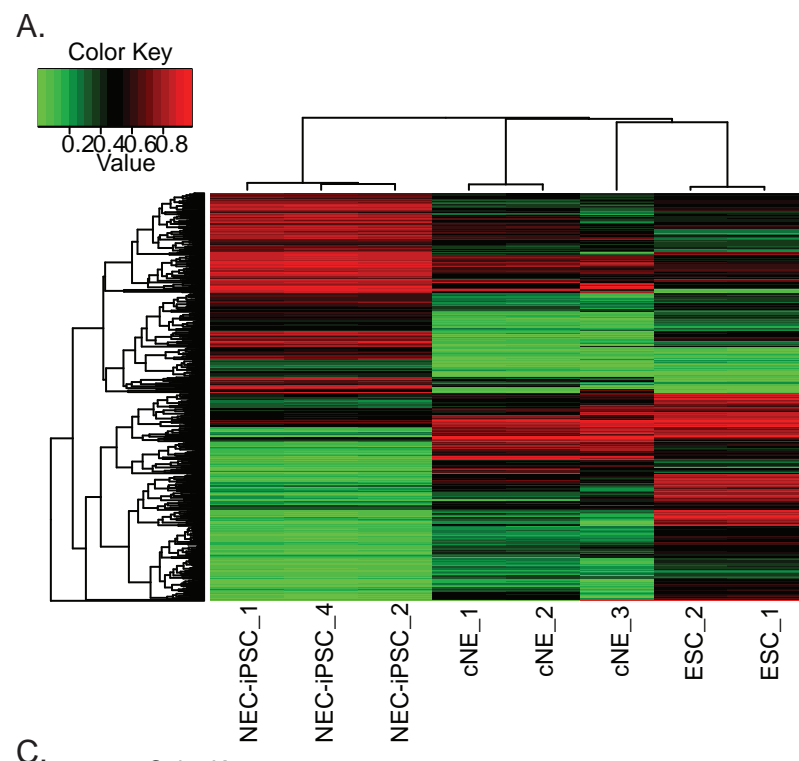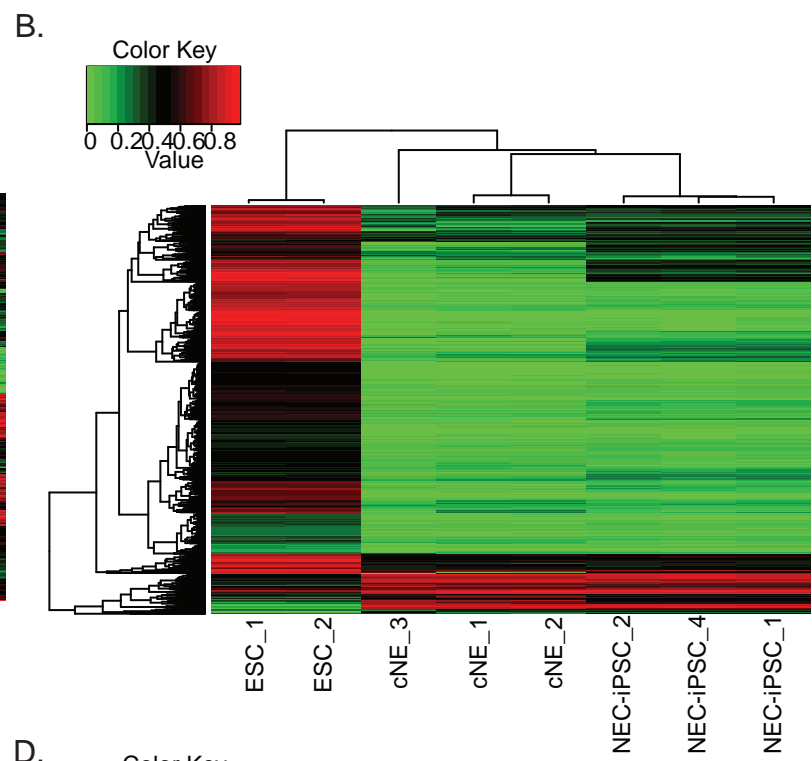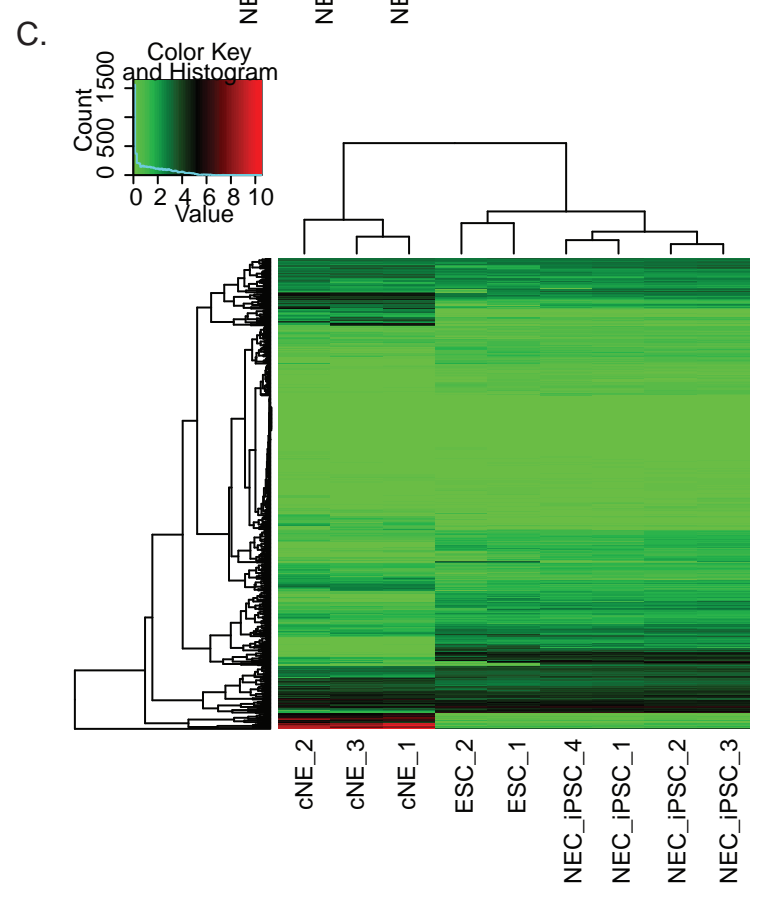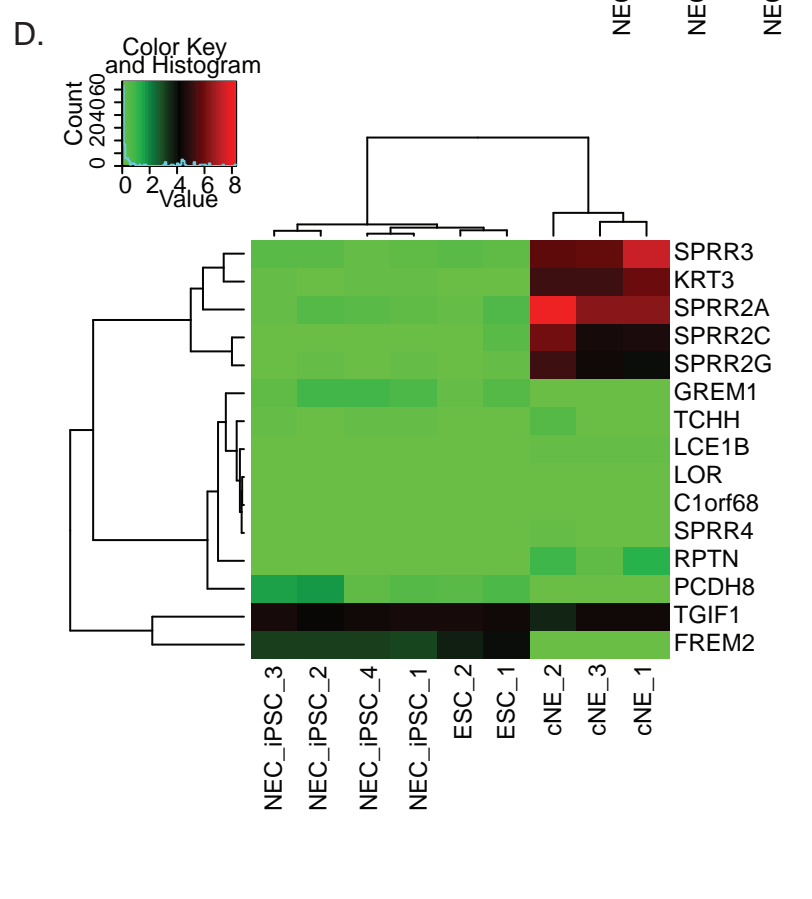

Supplement: NIHMS626704-supplement-3.pdf [file NIHMS626704-supplement-3.pdf]
