# Supplementary material
Source: PubMed Central journal article supplement (PMC4289122)

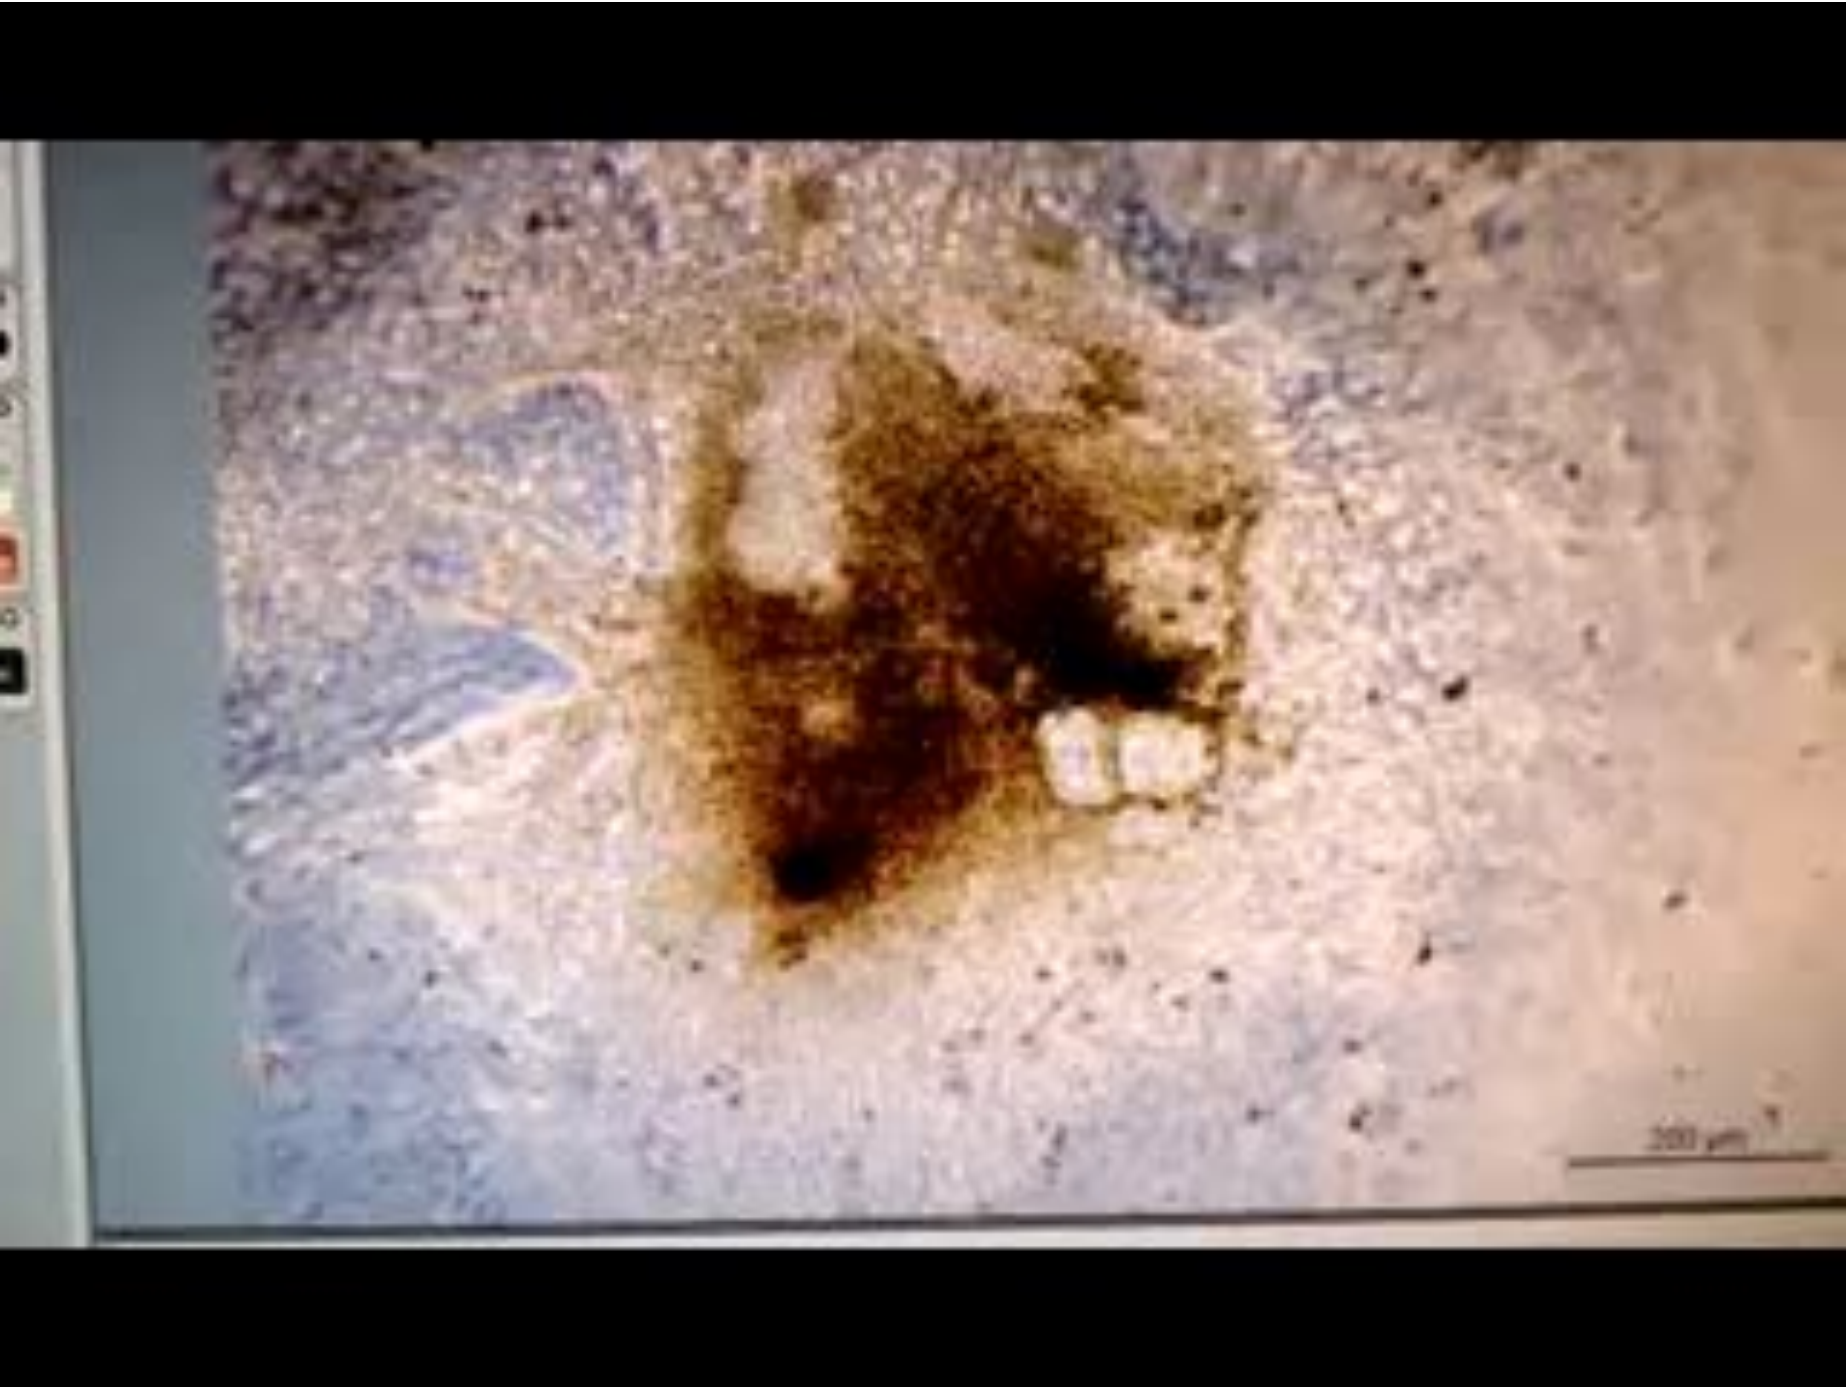

Supplement: NIHMS626704-supplement-2.pdf [file NIHMS626704-supplement-2.pdf]
